# Supplementary material
Source: Springer Nature journal article supplement (https://www.springermedizin.de/resource/supplementary/12937_2003_11_MOESM2_ESM.pdf/25654244)
Supplement: MOESM2 [file 25654244]

L-ascorbic acid

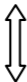

Ascorbyl radical

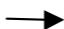

L-ascorbate  
sulphate

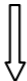

Dehydroascorbate

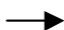

CO<sub>2</sub>

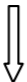

2,3-diketogulonic acid

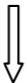

Oxalic acid
